# Supplementary material for: Multiple-P450 Gene Co-Up-Regulation in the Development of Permethrin Resistance in the House Fly, Musca domestica
Source: MDPI journal article supplement (doi:10.3390/ijms24043170), 2023-02-06
Supplement: s1 [file s1]

## Supplementary Materials

A.

CYP6A36

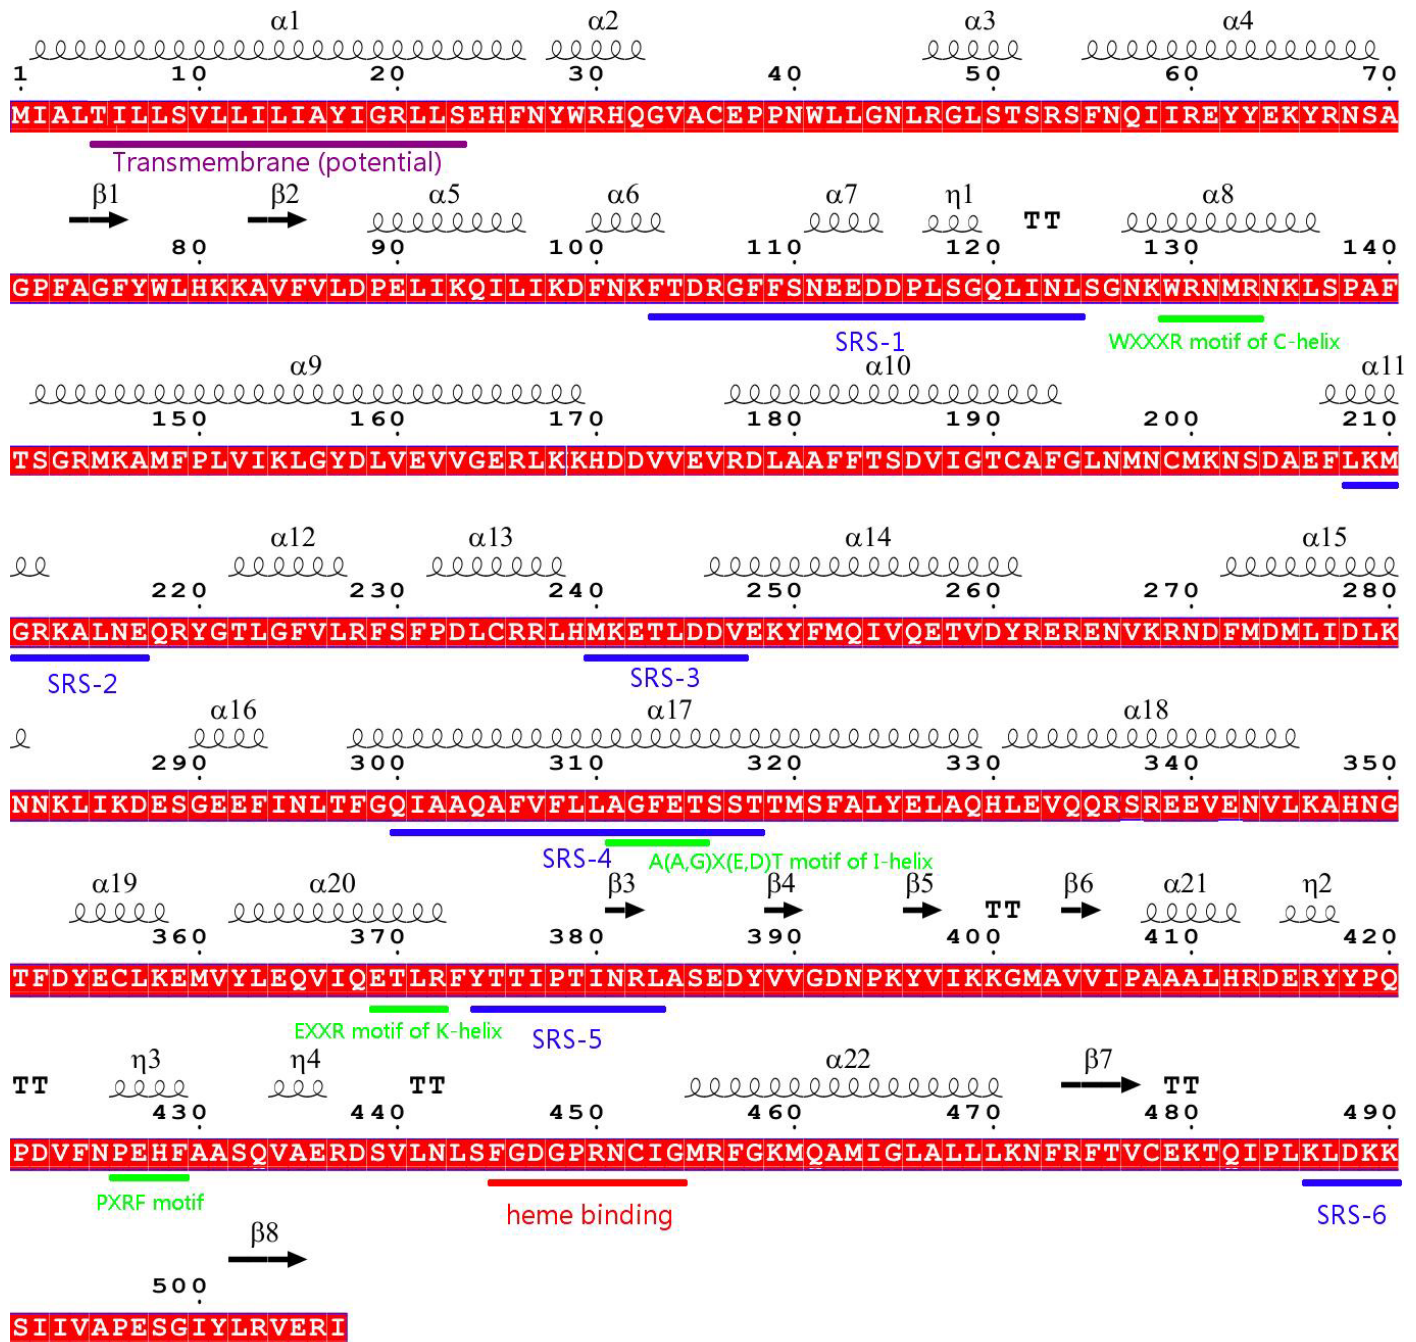

B.

CYP6D10

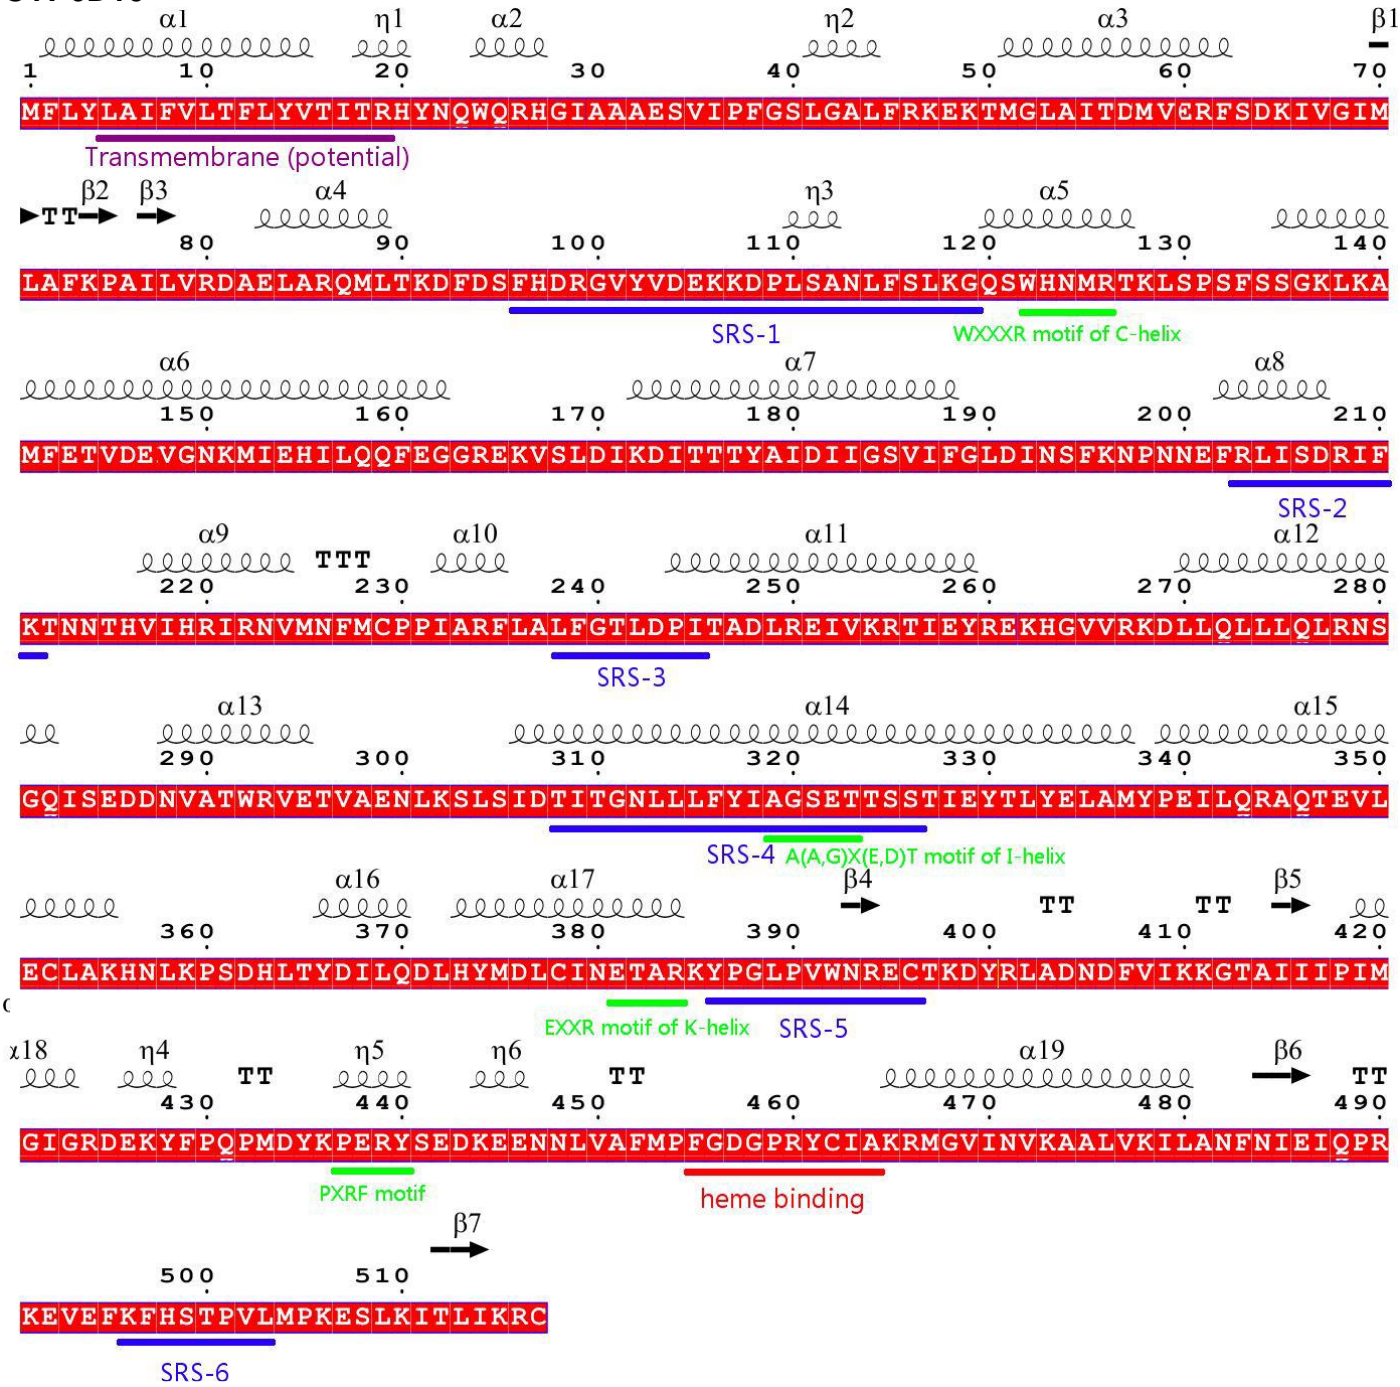

C.

# CYP4S24

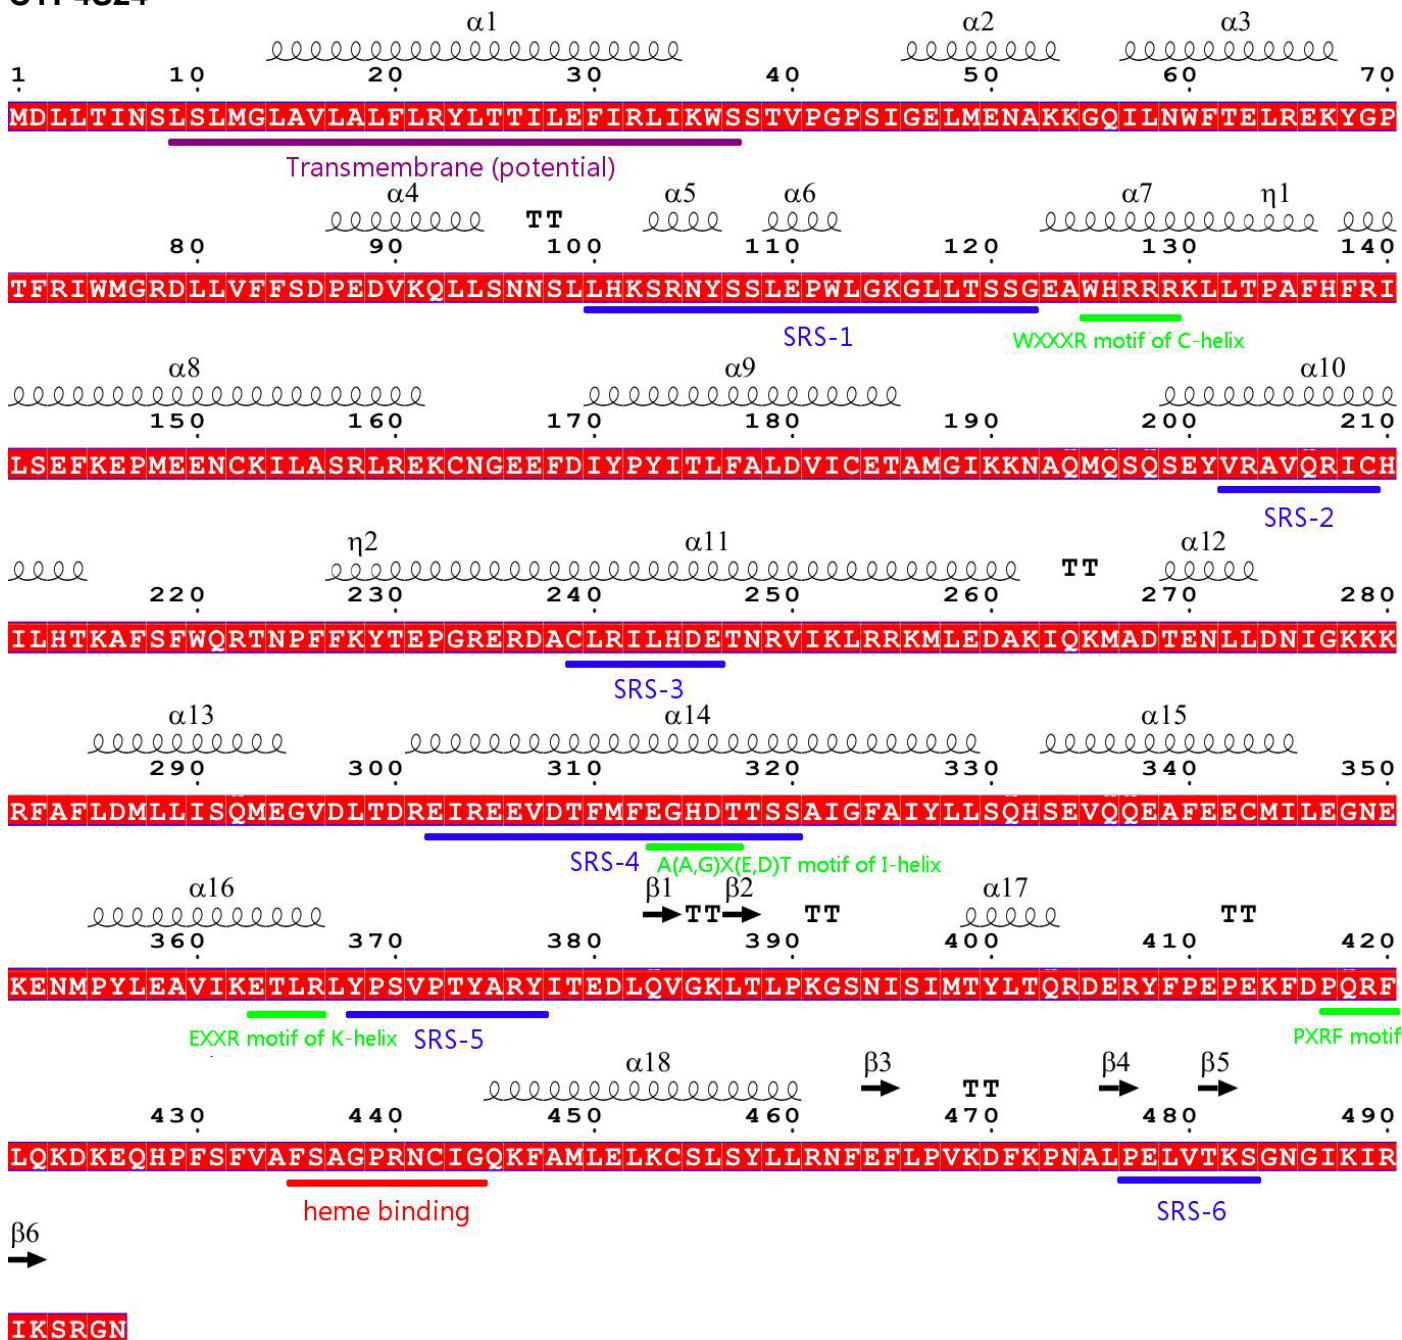

**Figure S1. Deduced amino acid sequence of P450s.** The sequence analysis was conducted by T-COFFEE (<http://tcoffee.crg.cat/>) and ESPript 3.0 (<http://esprict.ibcp.fr/ESPrict/ESPrict/>) (Gouet et al. 2003). Alpha-helices, eta-helices, beta strands and strict beta turns are marked as α, η, β and TT, respectively. The predicted transmembrane region, conserved domains common to cytochrome P450s, and the proposed substrate recognition sites (SRS) are indicated. (A) CYP6A36. (B) CYP6D10. (C) CYP4S24.

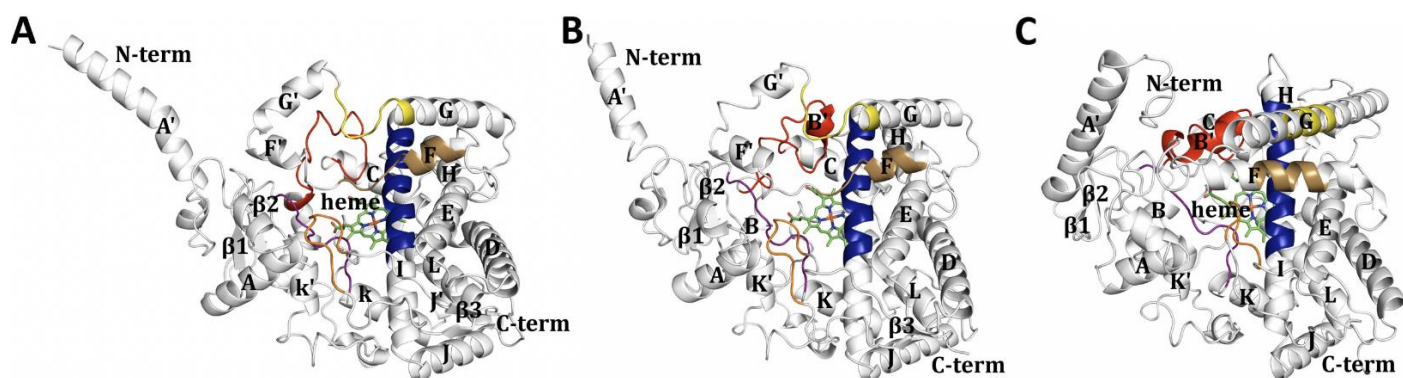

**Figure S2. Topology of P450s.** Secondary structure of helices and sheets are labeled. Six putative SRSs based on Gotoh's predicted models (Gotoh 1992) are shown. SRS 1 to 6 are shown in red, wheat, yellow, blue, purple and orange color, respectively. The heme group is represented by sticks. (A) CYP6A36. (B) CYP6D10. (C) CYP4S24.

**Table S1.** List and sequences of the primers used

| Gene                                               | Forward primer (5'-3')    | Reverse primer (5'-3')    |
|----------------------------------------------------|---------------------------|---------------------------|
| <i>Primers used for quantitative real time PCR</i> |                           |                           |
| CYP18A1                                            | TTAAGACCACCTGCTGTGGATCA   | GTGGCCAATGGTACAATGCTGGAA  |
| CYP304A2                                           | CAATGTTGTCGGCTCAGGTCGTTT  | AAGGTACCAGCGTCTCAATTCGCA  |
| CYP3073A1                                          | AAACGACAGCGGAGGGTTTGAGAT  | TAACCACACCATTGCTCAGTCGGA  |
| CYP3073A2                                          | GGTGCATGTATTTAGTGC GGCTT  | AGCTCGAACTCTCCGTCATCGTTT  |
| CYP3073B1                                          | ACAATGTTGGGTCACAAATGCCAGG | TTCAATGGTCTCCCGACATTCCCT  |
| CYP305A1                                           | TCACAAACCACCAGCACCACAATG  | TAGGCCTTGTTACCCAAACTGGGA  |
| CYP306A1                                           | TGCCATTCTATTTCGGATCGGTCA  | GCACTGAAGGCCACAAAGCTGAAT  |
| CYP28B1                                            | TACACCACCGAAGTTGT CAGCGAT | TCATCACCTTCTTAGGCTGGGCA   |
| CYP28B2                                            | GAAACCCGGAGACCCAAGAGAAAT  | AGTTTAGAGTTCACAGCCACGGGT  |
| CYP28G6                                            | TACTGGGTCTTCGGCTGATGCTT   | AAACTCCTCCACGGGCTTTGGTAT  |
| CYP310B2                                           | GATAGCATCGACGGCAGTATTT    | CTTTGTTTCACTGTTGCCATTAT   |
| CYP317A3                                           | TATGCAGCAAAGGGTACGGGAAGA  | AGAGTGC GACGATTACATAGGGT  |
| CYP6A1                                             | GTCTACGCGAGGAGGTTAATG     | GCGGAGTGTTTCATTCAATACC    |
| CYP6A24                                            | TTCGAATACCCAAGGGAACACCCA  | AAATCGGGCGCAATACAGTTTCG   |
| CYP6A25                                            | TTCCCGGTCATCCGAAATATG     | CGTCGGGATTGGGATAATACTG    |
| CYP6A36                                            | TTATCCTTTGGTGATGGTCCC     | CGCCACAATGATGCTCTTCTTA    |
| CYP6A37                                            | ATGAGTTGGCCCAGAATCAGGAGA  | ATT CAGAATGGGCAGGACGGTGTA |
| CYP6A4                                             | AAGGGCATAGATTTGT CGCATGGC | CCTGGTGCCTAGCCAATTCATAGA  |
| CYP6A40                                            | TGAGGGAGAGCAAGCAAATC      | TGTTGTGGAGGAGGTCTCATA     |
| CYP6A52                                            | ATGTGATTGGTCGCTGTGCCTTTG  | TACTTCTCCACATCGGGCATGGTT  |
| CYP6A7                                             | GCATTGTCCGCGAAACTGTGGAAT  | AACACAAAGGCCTGGCCAGTTATC  |
| CYP6A54                                            | GAAGGTATTTCGGTTCGAGAAA    | TGGCTCCAAAGTAGCGTAAAT     |
| CYP6A63P                                           | AGGCCATGATGGAGATGGCCTATT  | ATCCTCCATGCAGACACGCTGTAA  |
| CYP6A57                                            | GCTGCCCAGGTGTTTGCTCTCTTT  | AAAGTCTCTTTGACCTCCTGGCGT  |
| CYP6A58                                            | AATCGCCAAGCTGT CGAAGACTAC | TCCGGATTGAAGACATTGGGTGG   |
| CYP6A59                                            | CCTATGAGTCGCTGAAGGATATG   | GGGACCTGATAGTCTTTGACAC    |
| CYP6A5                                             | CAAATGGCCGCTCAGACCTTTGTT  | AGGCCCTCATAGGTTATTTGCCA   |
| CYP6C2                                             | TCTGTGGCGTAAGGTGAGAACCA   | TGCCAATGACATCGGTGGTGAAAC  |
| CYP6D10                                            | ACTGCTCGCAAATATCCTGGCCTA  | TCCGGCTTATAATCCATGGGCTGA  |
| CYP6D11                                            | CAGCGGCTACCATAGCATTTA     | CCCTCAACTTATGTTCCGTCAA    |
| CYP6D3                                             | AACTGCCTCAAGTACCTCATTTA   | TACGTCCATCCGGCTTTATTC     |
| CYP6D8                                             | TGGTCGGCGGTAAAGACAAAGGAT  | CGGCATTGCGTGCCAATTCATAGA  |
| CYP6EK2                                            | CCTTCCGAATTTGGCCCGGAAAT   | GGCCGCTATTTGTTC AACGTCAA  |
| CYP6F52                                            | AACCTTTAGCAACTCTTCGCGGA   | ATTGTGTGTTGCGATAACGCACGG  |
| CYP6FT3                                            | GACGATGACAGGGATATGATAAG   | GGCCAATTCAAAGAGAGCATTT    |
| CYP6G4                                             | TGACTGCTGGCTTTGAGACATCCT  | ATTTCTCGACGCAAACGTTCTCTGC |
| CYP6GU1                                            | TGCTCTCTATGAATTGGCCCGGAA  | AGGACGGCATATTTGCGTAGGGTT  |
| CYP6GW1                                            | GTTCCAGTTGACCATGGATATGA   | CTCATATAGGCCTGACACAAAG    |
| CYP6V3                                             | CGCAAGTACCCGATTGTGCCATTT  | AAAGAGGTCTGGTTCGGGCCAATA  |
| CYP9F10                                            | GTTCTACGCAAATGGCCGGTGAAT  | AAACGTTCCGGATCAAAGGCACTG  |
| CYP9F11                                            | AAATGGTCGTGTCGGAGGTGTTGA  | TTCCGGATCGAAGGCATCAGGATT  |
| CYP9F12                                            | CGATGAGGCCATGTCGTATT      | CAAATGCCGTCGAAGCAATAA     |
| CYP9F7                                             | CGATCAACGACAACCAATGCTGCT  | TGGCGACAAAGTGTGCGCATATC   |

|           |                           |                          |
|-----------|---------------------------|--------------------------|
| CYP9F8v1  | ATGCGTTCATGTTCCAGCTGATG   | GGCCAAATGCAGTCGAGGCAATAA |
| CYP9F9    | AAACAAGGCAAGGGAGAGGATGGA  | GACTTGCAGACCAAATGCAGTGCT |
| CYP311A1  | CCAATACCTCGGATCTCAACAA    | AATGTTACGCCAGGTGGATAG    |
| CYP313D1  | GGCTTTCGATGTGACCTATGCCAA  | TTGATGACACATTGCACACCAGCC |
| CYP313D2  | TGCACAGACGCAAGGATATATGGG  | TTAGCAACTTTGCCAAGGCCACCT |
| CYP318B1  | TGCATCGTAGTGAGATGTTTGGG   | GCCAAGTACATGCTATAGCGGCTT |
| CYP438A4  | CGGTCGATAAGGCAACGATAG     | GGCATACTGATACAAAGCGAATG  |
| CYP4AA1   | AACACTGGGATAGAGTCGCAACGA  | AGGCCATGATGGAGATGGCCTATT |
| CYP4AC6v1 | GAGGAGTATCGCAAGAAGAAGG    | CATCCAGCAGCGTATCCAA      |
| CYP4AD1   | GCCCTCTTACCACAGATTTA      | AATGCCACAGAGAAGTCGATAG   |
| CYP4AE3   | TTGCCTCTATGCACTATCGCGTCA  | CCAACAGCCGGAATTGGTGGAAT  |
| CYP4C74   | TGAGGAGGTTGACACGTTTATG    | TCGACAACACGTTCTCTGATATT  |
| CYP4D3    | TTCGGCCGTAACGTTCTGCTTCTA  | GCAGCGTCTCCTTGATGCACAAAT |
| CYP4D36   | GTCGAACCATTTACGCTGGCCAAA  | ATTGTGTAGACGCCGGAACAATGC |
| CYP4D4    | GCGAATGGCTTTCCTTGATGTGCT  | TCGTGGTGTGATGTCCTTCGAACA |
| CYP4D54   | CAGTTGCCGGAATAACAACACCA   | AGATGCGAACACTGCTCCACATA  |
| CYP4D55   | GCCTGTGTGGATGTGCTATTG     | TAAGGGCCTGCATCAAAGAG     |
| CYP4D56   | TGTTTCCAGTTGTGTGTCGCATGG  | TTGGCGAGGTGAGTTTGAAGAGGA |
| CYP4D58v1 | ATTTGCCACCGCCGAAATGAAGAG  | ACCCAATTGGACATCAGTCTCGGA |
| CYP4D9    | CAAGCGTTGCCGACATAATAG     | TCCCTCATCATCTTGCGATAC    |
| CYP4E10   | GCACCACCCTGCTACTATT       | CTCGAAGGGATTGTAGGTCATT   |
| CYP4E11   | CAAGATCATAACACCGGCATTTT   | GCCTCCCTCAATTTGTCCATA    |
| CYP4E7    | ATCAACATGCGTGCCTTCAATCCC  | ATTCTTTCGCTCCTGCTGGCTTC  |
| CYP4G13   | ATTGCCCCGTAAAGCGGAAGAGGAT | TAGATGTCGGCACGACGATGAACA |
| CYP4G2    | ATGACCCGTAAGTGGTGACGGAA   | TCATCCAAATCATCGCGCAAACCC |
| CYP4G99   | TGAGACATCGTAGCCTCTTTCTG   | CGTTGCCATTGGAGTTTAGAC    |
| CYP4P8    | AATGCGCGAAGCAGTCGAAGAAAC  | AAAGCATACGGATGACGTCCACAA |
| CYP4P10   | ACGACATACATCGTAATCCCAGGC  | AAATGCAAACGGGTGCCTCTGTTC |
| CYP4S23   | TGCCATTCTATTGCGGATCGGTCA  | GCACTGAAGGCCACAAAGCTGAAT |
| CYP4S24   | GGTCCAACATTTGCGATTTG      | GCTTCACCACTACTCGTCAGCA   |
| CYP12A1   | AAGTGGAGTGCCAGAGAAAC      | GTATCCACACCAGCCAATATCA   |
| CYP12A3   | CCCACAGCAAAGCGTATGTTCCAA  | GCCGAACAATGGCCTCTTCAACAA |
| CYP12A14  | AGGGCCTGCATTAAGGAATCGCTA  | AGCTCTCAACCATCGTTGGGTAA  |
| CYP12A16  | GCCAATGGCAACATCGAACCAAGT  | AAGAGCAAGCCGTAAAGGCAGAT  |
| CYP12A17  | TAAGGGCCTGCATCAAAGAG      | GATAACCGCTGAGGACAACAT    |
| CYP12A13  | CCCTGCGCATGTATCCATTGACAT  | ACTTCCTGATTGCGTTGGCCTCAA |
| CYP12A2   | AGTGGCTATCGTGTCCCAAAGGT   | GGCATGTGGACATTGACGGATT   |
| CYP12G2   | ATGGGCGGTGTAGAAATCACCTCA  | ATGGAGAAATCTTCGTGCCGTCCA |
| CYP12G4   | TGTTTGGCAATATGCGAGCCTTGG  | TTTCGGGCTGTGATATCTTCGGCA |
| CYP301A1  | ACGGATCGCCTAAAGGTTCAAGGA  | CAAACCGCCATGGAAATGGTGTC  |
| CYP302A1  | TGCTTGTCTGAAGGAGGTATTC    | TCCTTCGGCACCAAATATCC     |
| CYP314A1  | ACCGAACAGCCGGAGAAGATCAAA  | TTTCCTGTAGGTCTGCGTGGGAAA |
| CYP315A1  | TTTATACTGCCGGTCTGTATCCCA  | ATAGGGCCAATTTGCGGCCAATAC |
| Actin     | ATGAGGCTCAGAGCAAACGTGGTA  | AGTCATCTTCTCGGATTGGCCTT  |
| Dm RPL11  | CGATCCCTCCATCGGTATCT      | AACCACTTCATGGCATCCTC     |

Primers used for autosome mapping

|         |                          |                         |
|---------|--------------------------|-------------------------|
| CYP4E10 | F1: CGATTTGAAGAACCAGAAGC | R: ACTCATTGTTGTGGCTCTCA |
|---------|--------------------------|-------------------------|

|                                                           |                                       |                                     |
|-----------------------------------------------------------|---------------------------------------|-------------------------------------|
|                                                           | F2: AAGCTGATTAAGGCGGAAC               |                                     |
| CYP4E11                                                   | F1: CCAGGCCTGTAACGGCAATCC             | R: ACTCATTGTTGTGGCTCTCA             |
|                                                           | F2: GGCCGATAACTATGCCACCGTT            |                                     |
| CYP4G13                                                   | F1: GTCTTCAAGGATTGTGGTGAAC            | R: TATTGTCACGCTCACGTAGCTTG          |
|                                                           | F2: TTTGTGCCCACATTTGTCAAG             |                                     |
| CYP4G99                                                   | F1: TTGGACTTGCTCTTGGAGA               | R: TGGTAGCCACTGTGATGGT              |
|                                                           | F2: TGGTGCCACCATTACGGACACT            |                                     |
| CYP4S24                                                   | F1: AGAGAATCTGCCACATCTTGC             | R: TGCCGAACCTTGTCGTATCG             |
|                                                           | F2: CGAAGATGCCAAGATACAAAAT            |                                     |
| CYP6A36                                                   | F1: TTTAAGGGTCTCTCGACGAGT             | R: AATGGAAACATGGCCTTCATA            |
|                                                           | F2: TTATGAGAAATATAGAAATTCGC           |                                     |
| CYP6A52                                                   | F1: ATGTGATTGGTCGCTGTGCCTTTG          | R: CATACCCCTTGCGTATGACATAG          |
|                                                           | F2: CCCAAATCGGAATTCGCG                |                                     |
| CYP6A40                                                   | F1: CATTCTCACCAGGGATTICA              | R: AAAGGCACAGCAGCCAAT               |
|                                                           | F2: GCTGACACCCACCTTCAGTTCA            |                                     |
| CYP6A58                                                   | F1: CACCTTTACCTCGGCAAA                | R: CGCCATCCTCACTCTTCATC             |
|                                                           | F2: AACCGAAACCATGCCCGATGT             |                                     |
| CYP6D3                                                    | F1: GACGCTACAAATCTCAAGG               | R: GTTTCATCGGCAAAATCGTTC            |
|                                                           | F2: TGAATTGGCCATGAATCCAGAT            |                                     |
| CYP6D10                                                   | F1: CTACCCGTTTGAATCGTG                | R: TCCTTGCGTGGCTGTATT               |
|                                                           | F2: AAAGCTGCCCTGGTAAAAATG             |                                     |
| CYP9F10                                                   | F1: GCTTTTCTTATTGCCGCGATAG            | R: GTCAGTGCCTTCGGTAAATAC            |
|                                                           | F2: ATGCCAAGCCTTCGTCTTTTA             |                                     |
| <i>Primers used for transgenic Drosophila flies study</i> |                                       |                                     |
| CYP4S24                                                   | CCGGGATCCCAAAATGGATTTACTAACAATCAACAG  | CTAGCTAGCATTGCCACGCGATTTTATG        |
| CYP6A36                                                   | CCGAGATCTCAAAATGATCGCTTTGACAATA       | CTAGTCTAGACAACCTCTCCACCTTCAA        |
| CYP6A52                                                   | CCGAGATCTCAAAATGGTTTTTCTAACGCTT       | CTAGTCTAGACAACCTCTCCACCTTCAA        |
| CYP6D10                                                   | CCGGAATTCCAAAATGTTTTTATATTGGCTATATTCG | CTAGGCTAGCACATCGTTTTATGAGTGTAATTTTC |
| <i>Primers used for in vitro metabolism study</i>         |                                       |                                     |
| CYP4S24                                                   | CACCATGGATTTACTAACAATCAA              | TCAATTGCCACGCGATTTTA                |
| CYP6A36                                                   | CACCATGATCGCTTTGACAATACT              | TCAAATCCTCTCCACACGCA                |
| CYP6D10                                                   | CACCATGTTTTTATATTGG                   | TCAACATCGTTTTATGAGTGTAATTTTC        |
| Reductase                                                 | CACCATGAGCGCGGAACAC                   | CTAGCTCCAAACGTCCGCG                 |

**Table S2.** List of selected P450 genes in the ALHF *M. domestica*

| Name <sup>†</sup> | SC_number <sup>‡</sup> | XM_number <sup>‡</sup> | XP_number <sup>‡</sup> |
|-------------------|------------------------|------------------------|------------------------|
| CYP18A1           | NW_004765049           | XM_005183375           | XP_005183432           |
| CYP304A2          | NW_004765002           | XM_005183057           | XP_005183114           |
| CYP305A1          | NW_004764745           | XM_005180589           | XP_005180646           |
| CYP306A1          | NW_004765049           | XM_005183378           | XP_005183435           |
| CYP28B1           | NW_004764738           | XM_005180394           | XP_005180451           |
| CYP28B2           | NW_004764738           | XM_005180398           | XP_005180455           |
| CYP28G6           | NW_004765174           | XM_005184255           | XP_005184312           |
| CYP310B2          | NW_004765160           | XM_005184125           | XP_005184182           |
| CYP317A3          | NW_004765183           | XM_005184339           | XP_005184396           |
| CYP438A4          | NW_004765049           | XM_005183376           | XP_005183433           |
| CYP6A1            | NW_004765183           | XM_005184331           | XP_005184388           |
| CYP6A24           | NW_004768817           | XM_005190469           | XP_005190526           |
| CYP6A25           | NW_004768817           | XM_005190472           | XP_005190529           |
| CYP6A36           | NW_004765183           | XM_005184332           | XP_005184389           |
| CYP6A37           | NW_004765183           | XM_005184336           | XP_005184393           |
| CYP6A4            | NW_004765183           | XM_005184338           | XP_005184395           |
| CYP6A40           | NW_004765183           | XM_005184343           | XP_005184400           |
| CYP6A5            | NW_004765183           | XM_005184346           | XP_005184405           |
| CYP6A52           | NW_004765183           | XM_005184334           | XP_005184391           |
| CYP6A54           | NW_004760864           | XM_005175565           | XP_005175622           |
| CYP6A57           | NW_004768817           | XM_005190468           | XP_005190525           |
| CYP6A58           | NW_004765183           | XM_005184341           | XP_005184398           |
| CYP6A59           | NW_004765183           | XM_005184344           | XP_005184401           |
| CYP6A63P          | NW_004760864           | XM_005175566           | XP_005175623           |
| CYP6A7            | NW_004765183           | XM_005184333           | XP_005184390           |
| CYP6C2            | NW_004765183           | XM_005184350           | XP_005184407           |
| CYP6D10           | NW_004765160           | XM_005184128           | XP_005184185           |
| CYP6D11           | NW_004765015           | XM_005183145           | XP_005183202           |
| CYP6D3            | NW_004765160           | XM_005184123           | XP_005184180           |
| CYP6D8            | NW_004765436           | XM_005185673           | XP_005185730           |
| CYP6EK2           | NW_004765349           | XM_005185208           | XP_005185265           |
| CYP6FS2           | NW_004764906           | XM_005182161           | XP_005182218           |
| CYP6FT3           | NW_004768760           | XM_005190452           | XP_005190509           |
| CYP6G4            | NW_004766190           | XM_005188667           | XP_005188724           |
| CYP6GU1           | NW_004765183           | XM_005184337           | XP_005184394           |
| CYP6GW1           | NW_004768817           | XM_005190471           | XP_005190528           |
| CYP6V3            | NW_004764478           | XM_005176346           | XP_005176403           |
| CYP9F10           | NW_004764700           | XM_005180062           | XP_005180119           |
| CYP9F11           | NW_004764700           | XM_005180054           | XP_005180111           |
| CYP9F12           | NW_004764700           | XM_005180063           | XP_005180120           |
| CYP9F7            | NW_004764700           | XM_005180052           | XP_005180109           |
| CYP9F8v1          | NW_004764700           | XM_005180050           | XP_005180107           |
| CYP9F9            | NW_004764700           | XM_005180053           | XP_005180110           |
| CYP3073A1         | NW_004765739           | XM_005187010           | XP_005187067           |
| CYP3073A2         | NW_004765739           | XM_005187012           | XP_005187069           |
| CYP3073B1         | NW_004765739           | XM_005187011           | XP_005187068           |
| CYP311A1          | NW_004764740           | XM_005180423           | XP_005180480           |
| CYP313D1          | NW_004767316           | XM_005189825           | XP_005189882           |
| CYP313D2          | NW_004766063           | XM_005188279           | XP_005188336           |

---

|           |              |              |              |
|-----------|--------------|--------------|--------------|
| CYP318B1  | NW_004766506 | XM_005189277 | XP_005189334 |
| CYP4AA1   | NW_004764464 | XM_005175977 | XP_005176034 |
| CYP4AC6v1 | NW_004765632 | XM_005186465 | XP_005186522 |
| CYP4AD1   | NW_004765578 | XM_005186278 | XP_005186335 |
| CYP4AE3   | NW_004764514 | XM_005177255 | XP_005177311 |
| CYP4C74   | NW_004765515 | XM_005185973 | XP_005186030 |
| CYP4D3    | NW_004764514 | XM_005177258 | XP_005177315 |
| CYP4D36   | NW_004764744 | XM_005180553 | XP_005180610 |
| CYP4D4    | NW_004765144 | XM_005183986 | XP_005184043 |
| CYP4D54   | NW_004764514 | XM_005177250 | XP_005177307 |
| CYP4D55   | NW_004764514 | XM_005177252 | XP_005177309 |
| CYP4D56   | NW_004764514 | XM_005177251 | XP_005177308 |
| CYP4D58v1 | NW_004765144 | XM_005183988 | XP_005184045 |
| CYP4D9    | NW_004764514 | XM_005177345 | XP_005177402 |
| CYP4E10   | NW_004765578 | XM_005186272 | XP_005186329 |
| CYP4E11   | NW_004765578 | XM_005186268 | XP_005186325 |
| CYP4E7    | NW_004765578 | XM_005186267 | XP_005186324 |
| CYP4G13   | NW_004764475 | XM_005176292 | XP_005176349 |
| CYP4G2    | NW_004764475 | XM_005176294 | XP_005176351 |
| CYP4G99   | NW_004764542 | XM_005177736 | XP_005177793 |
| CYP4P10   | NW_004764771 | XM_005180896 | XP_005180953 |
| CYP4P8    | NW_004764771 | XM_005180909 | XP_005180966 |
| CYP4S23   | NW_004764524 | XM_005177495 | XP_005177552 |
| CYP4S24   | NW_004764524 | XM_005177488 | XP_005177545 |
| CYP12A1   | NW_004764697 | XM_005180004 | XP_005180061 |
| CYP12A13  | NW_004764697 | XM_005180007 | XP_005180064 |
| CYP12A14  | NW_004764697 | XM_005179996 | XP_005180053 |
| CYP12A16  | NW_004769267 | XM_005190663 | XP_005190720 |
| CYP12A17  | NW_004764512 | XM_005177016 | XP_005177073 |
| CYP12A2   | NW_004764697 | XM_005179998 | XP_005180055 |
| CYP12A3   | NW_004764697 | XM_005179997 | XP_005180054 |
| CYP12G2   | NW_004764745 | XM_005180644 | XP_005180701 |
| CYP12G4   | NW_004765031 | XM_005183241 | XP_005183298 |
| CYP301A1  | NW_004764517 | XM_005177409 | XP_005177466 |
| CYP302A1  | NW_004764628 | XM_005179205 | XP_005179262 |
| CYP314A1  | NW_004764603 | XM_005178726 | XP_005178783 |
| CYP315A1  | NW_004765301 | XM_005184970 | XP_005185027 |

<sup>†</sup> Nomenclature provided by the cytochrome P450 nomenclature committee, David R. Nelson.

<sup>‡</sup> RefSeq accession number, National Center for Biotechnology Information, Bethesda, MD. SC\_number: supercontig number; XM\_number: mRNA sequence number; XP\_number: amino acid sequence number.

**Table S3.** Relative expression profile of 86 P450 genes in three strains of *Musca domestica*

| Gene                                                                                                  | Relative gene expression $\pm$ SEM* |                 |                    |
|-------------------------------------------------------------------------------------------------------|-------------------------------------|-----------------|--------------------|
|                                                                                                       | aabys                               | CS              | ALHF               |
| Expression significantly up-regulated in the ALHF house flies compared to both aabys and CS strains   |                                     |                 |                    |
| <i>CYP4E10</i>                                                                                        | 1.00                                | 1.56 $\pm$ 0.08 | 274.42 $\pm$ 22.40 |
| <i>CYP4E11</i>                                                                                        | 1.00                                | 1.22 $\pm$ 0.12 | 5.86 $\pm$ 0.55    |
| <i>CYP4G13</i>                                                                                        | 1.00                                | 0.99 $\pm$ 0.11 | 2.13 $\pm$ 0.13    |
| <i>CYP4G99</i>                                                                                        | 1.00                                | 0.54 $\pm$ 0.07 | 4.52 $\pm$ 0.31    |
| <i>CYP4S24</i>                                                                                        | 1.00                                | 1.04 $\pm$ 0.11 | 2.94 $\pm$ 0.08    |
| <i>CYP6A36</i>                                                                                        | 1.00                                | 1.11 $\pm$ 0.03 | 7.03 $\pm$ 0.64    |
| <i>CYP6A40</i>                                                                                        | 1.00                                | 1.08 $\pm$ 0.11 | 2.95 $\pm$ 0.22    |
| <i>CYP6A52</i>                                                                                        | 1.00                                | 1.01 $\pm$ 0.11 | 2.74 $\pm$ 0.15    |
| <i>CYP6A58</i>                                                                                        | 1.00                                | 0.84 $\pm$ 0.18 | 4.32 $\pm$ 1.02    |
| <i>CYP6D10</i>                                                                                        | 1.00                                | 1.77 $\pm$ 0.07 | 6.24 $\pm$ 0.63    |
| <i>CYP6D3</i>                                                                                         | 1.00                                | 0.26 $\pm$ 0.05 | 2.40 $\pm$ 0.13    |
| <i>CYP9F10</i>                                                                                        | 1.00                                | 1.23 $\pm$ 0.09 | 2.01 $\pm$ 0.19    |
| Expression significantly down-regulated in the ALHF house flies compared to both aabys and CS strains |                                     |                 |                    |
| <i>CYP12A3</i>                                                                                        | 1.00                                | 0.74 $\pm$ 0.01 | 0.35 $\pm$ 0.15    |
| <i>CYP12G4</i>                                                                                        | 1.00                                | 1.21 $\pm$ 0.12 | 0.35 $\pm$ 0.05    |
| <i>CYP28G6</i>                                                                                        | 1.00                                | 1.18 $\pm$ 0.17 | 0.21 $\pm$ 0.04    |
| <i>CYP3073A1</i>                                                                                      | 1.00                                | 1.03 $\pm$ 0.11 | 0.12 $\pm$ 0.03    |
| <i>CYP4AD1</i>                                                                                        | 1.00                                | 0.94 $\pm$ 0.08 | 0.07 $\pm$ 0.01    |
| <i>CYP4D4</i>                                                                                         | 1.00                                | 2.25 $\pm$ 0.19 | 0.66 $\pm$ 0.08    |
| <i>CYP6A24</i>                                                                                        | 1.00                                | 1.08 $\pm$ 0.11 | 0.69 $\pm$ 0.07    |
| <i>CYP6A5</i>                                                                                         | 1.00                                | 1.44 $\pm$ 0.08 | 0.67 $\pm$ 0.07    |
| <i>CYP6A57</i>                                                                                        | 1.00                                | 1.89 $\pm$ 0.17 | 0.66 $\pm$ 0.03    |
| <i>CYP6A63P</i>                                                                                       | 1.00                                | 0.22 $\pm$ 0.05 | 0.08 $\pm$ 0.03    |
| <i>CYP6D8</i>                                                                                         | 1.00                                | 0.74 $\pm$ 0.09 | 0.18 $\pm$ 0.04    |
| <i>CYP6EK2</i>                                                                                        | 1.00                                | 1.39 $\pm$ 0.13 | 0.41 $\pm$ 0.11    |
| <i>CYP6FT3</i>                                                                                        | 1.00                                | 0.83 $\pm$ 0.09 | 0.06 $\pm$ 0.01    |
| <i>CYP6GW1</i>                                                                                        | 1.00                                | 0.84 $\pm$ 0.07 | 0.08 $\pm$ 0.01    |
| Others                                                                                                |                                     |                 |                    |
| <i>CYP12A1</i>                                                                                        | 1.00                                | 1.28 $\pm$ 0.12 | 1.02 $\pm$ 0.19    |
| <i>CYP12A13</i>                                                                                       | 1.00                                | 0.04 $\pm$ 0.04 | 0.54 $\pm$ 0.06    |
| <i>CYP12A14</i>                                                                                       | 1.00                                | 0.36 $\pm$ 0.06 | 0.74 $\pm$ 0.08    |
| <i>CYP12A16</i>                                                                                       | 1.00                                | 1.96 $\pm$ 0.13 | 1.85 $\pm$ 0.17    |
| <i>CYP12A17</i>                                                                                       | 1.00                                | 3.13 $\pm$ 0.11 | 2.81 $\pm$ 0.24    |
| <i>CYP12A2</i>                                                                                        | 1.00                                | 1.67 $\pm$ 0.08 | 1.53 $\pm$ 0.14    |
| <i>CYP12G2</i>                                                                                        | 1.00                                | 2.99 $\pm$ 0.25 | 2.16 $\pm$ 0.19    |
| <i>CYP18A1</i>                                                                                        | 1.00                                | 2.75 $\pm$ 0.23 | 2.64 $\pm$ 0.22    |
| <i>CYP28B1</i>                                                                                        | 1.00                                | 0.95 $\pm$ 0.11 | 1.04 $\pm$ 0.12    |
| <i>CYP28B2</i>                                                                                        | 1.00                                | 1.68 $\pm$ 0.08 | 1.55 $\pm$ 0.14    |
| <i>CYP301A1</i>                                                                                       | 1.00                                | 0.78 $\pm$ 0.08 | 0.69 $\pm$ 0.07    |
| <i>CYP302A1</i>                                                                                       | 1.00                                | 0.20 $\pm$ 0.05 | 0.68 $\pm$ 0.07    |

---

|                  |      |             |              |
|------------------|------|-------------|--------------|
| <i>CYP304A2</i>  | 1.00 | 0.15±0.03   | 0.74±0.16    |
| <i>CYP305A1</i>  | 1.00 | 4.27±0.34   | 2.32±0.18    |
| <i>CYP306A1</i>  | 1.00 | 0.95±0.10   | 1.09±0.11    |
| <i>CYP3073A2</i> | 1.00 | 0.34±0.06   | 0.37±0.05    |
| <i>CYP3073B1</i> | 1.00 | 0.74±0.13   | 0.88±0.09    |
| <i>CYP310B2</i>  | 1.00 | 1.25±0.31   | 1.51±0.14    |
| <i>CYP311A1</i>  | 1.00 | 0.96±0.11   | 0.86±0.09    |
| <i>CYP313D1</i>  | 1.00 | 530.5±46.61 | 512.12±27.76 |
| <i>CYP313D2</i>  | 1.00 | 0.93±0.12   | 0.79±0.08    |
| <i>CYP314A1</i>  | 1.00 | 1.65±0.15   | 1.26±0.12    |
| <i>CYP315A1</i>  | 1.00 | 1.88±0.13   | 2.07±0.18    |
| <i>CYP317A3</i>  | 1.00 | 0.98±0.13   | 1.14±0.11    |
| <i>CYP318B1</i>  | 1.00 | 0.91±0.13   | 0.99±0.11    |
| <i>CYP438A4</i>  | 1.00 | 0.89±0.11   | 0.88±0.09    |
| <i>CYP4AA1</i>   | 1.00 | 1.13±0.11   | 1.30±0.06    |
| <i>CYP4AC6v1</i> | 1.00 | 27.45±3.72  | 23.59±1.94   |
| <i>CYP4AE3</i>   | 1.00 | 0.44±0.06   | 0.62±0.08    |
| <i>CYP4C74</i>   | 1.00 | 5.16±0.41   | 1.60±0.15    |
| <i>CYP4D3</i>    | 1.00 | 0.89±0.13   | 1.06±0.13    |
| <i>CYP4D36</i>   | 1.00 | 1.11±0.08   | 1.03±0.12    |
| <i>CYP4D54</i>   | 1.00 | 0.41±0.06   | 0.59±0.06    |
| <i>CYP4D55</i>   | 1.00 | 0.53±0.07   | 1.04±0.16    |
| <i>CYP4D56</i>   | 1.00 | 0.79±0.09   | 0.51±0.06    |
| <i>CYP4D9</i>    | 1.00 | 1.02±0.11   | 1.08±0.13    |
| <i>CYP4D58V1</i> | 1.00 | 5.87±0.39   | 4.33±0.93    |
| <i>CYP4E7</i>    | 1.00 | 1.11±0.11   | 1.05±0.12    |
| <i>CYP4G2</i>    | 1.00 | 1.08±0.05   | 1.20±0.23    |
| <i>CYP4P10</i>   | 1.00 | 2.98±0.26   | 2.93±0.11    |
| <i>CYP4P8</i>    | 1.00 | 1.02±0.07   | 0.81±0.08    |
| <i>CYP4S23</i>   | 1.00 | 11.69±1.31  | 6.61±0.55    |
| <i>CYP6A1</i>    | 1.00 | 2.94±0.42   | 2.91±0.25    |
| <i>CYP6A25</i>   | 1.00 | 3.67±0.32   | 1.05±0.10    |
| <i>CYP6A37</i>   | 1.00 | 1.04±0.11   | 0.88±0.06    |
| <i>CYP6A4</i>    | 1.00 | 2.02±0.18   | 1.18±0.05    |
| <i>CYP6A54</i>   | 1.00 | 3.55±0.29   | 2.57±0.23    |
| <i>CYP6A59</i>   | 1.00 | 1.17±0.12   | 0.86±0.09    |
| <i>CYP6A7</i>    | 1.00 | 52.34±3.8   | 10.41±0.86   |
| <i>CYP6C2</i>    | 1.00 | 1.51±0.14   | 0.82±0.08    |
| <i>CYP6D11</i>   | 1.00 | 0.43±0.06   | 0.77±0.08    |
| <i>CYP6FS2</i>   | 1.00 | 0.97±0.11   | 1.24±0.12    |
| <i>CYP6G4</i>    | 1.00 | 3.22±0.26   | 2.41±0.31    |
| <i>CYP6GU1</i>   | 1.00 | 1.79±0.16   | 1.91±0.21    |
| <i>CYP6V3</i>    | 1.00 | 0.96±0.10   | 0.92±0.09    |
| <i>CYP9F11</i>   | 1.00 | 1.24±0.05   | 0.99±0.09    |
| <i>CYP9F12</i>   | 1.00 | 2.17±0.19   | 1.02±0.10    |
| <i>CYP9F7</i>    | 1.00 | 1.23±0.09   | 1.31±0.12    |
| <i>CYP9F8v1</i>  | 1.00 | 1.24±0.12   | 1.18±0.09    |

---

|               |      |           |           |
|---------------|------|-----------|-----------|
| <i>CYP9F9</i> | 1.00 | 1.06±0.11 | 0.81±0.08 |
|---------------|------|-----------|-----------|

---

\* The relative levels of gene expression were shown as a ratio in comparison with that in aabys flies, the data are shown as the mean  $\pm$  S.E.M.

**Table S4.** Ethoxycoumarin 7-O-deethylation activity of recombinant P450s/CPR proteins

|                                                              | CYP4S24/CPR  | CYP6A36/CPR   | CYP6D10/CPR   |
|--------------------------------------------------------------|--------------|---------------|---------------|
| 7-Hydroxycoumarin formed<br>(pmol/min/mg microsomal protein) | 147.06± 7.11 | 262.55 ± 8.38 | 512.73 ± 5.44 |

**Table S5.** Docking results of selected P450 homology models

| Enzyme  | Active cavity<br>volume (Å <sup>3</sup> ) § | Chemical         | Putative metabolic<br>site <sup>#</sup> | Estimate free energy<br>(kcal/mol) | Distance from heme iron<br>(Å) * |
|---------|---------------------------------------------|------------------|-----------------------------------------|------------------------------------|----------------------------------|
| CYP6A36 | 482                                         | cis-permethrin   | gem                                     | -8.31                              | 2.94                             |
|         |                                             |                  | C5-PB                                   | -7.92                              | 3.23                             |
|         |                                             |                  | C4'-PB                                  | -8.55                              | 2.91                             |
|         |                                             | trans-permethrin | gem                                     | -10.93                             | 2.90                             |
|         |                                             |                  | C5-PB                                   | -9.21                              | 3.13                             |
|         |                                             |                  | C4'-PB                                  | -10.5                              | 2.79                             |
|         |                                             | PBalc            | C4'-PB                                  | -6.07                              | 3.53                             |
|         |                                             | Pbald            | C4'-PB                                  | -6.88                              | 3.51                             |
|         |                                             |                  |                                         |                                    |                                  |
| CYP6A52 | 537                                         | cis-permethrin   | gem                                     | -8.83                              | 3.36                             |
|         |                                             |                  | C5-PB                                   | -7.24                              | 3.62                             |
|         |                                             |                  | C4'-PB                                  | -7.47                              | 3.61                             |
|         |                                             | trans-permethrin | gem                                     | -10.13                             | 2.91                             |
|         |                                             |                  | C5-PB                                   | -8.52                              | 3.42                             |
|         |                                             |                  | C4'-PB                                  | -8.93                              | 3.01                             |
|         |                                             | PBalc            | C4'-PB                                  | -6.86                              | 3.46                             |
|         |                                             | Pbald            | C4'-PB                                  | -6.73                              | 3.24                             |
|         |                                             |                  |                                         |                                    |                                  |
| CYP6D10 | 574                                         | cis-permethrin   | gem                                     | -8.72                              | 3.52                             |
|         |                                             |                  | C5-PB                                   | -8.06                              | 3.60                             |
|         |                                             |                  | C4'-PB                                  | -8.13                              | 3.11                             |
|         |                                             | trans-permethrin | gem                                     | -9.70                              | 2.92                             |
|         |                                             |                  | C5-PB                                   | -9.05                              | 3.35                             |
|         |                                             |                  | C4'-PB                                  | -9.77                              | 2.96                             |
|         |                                             | PBalc            | C4'-PB                                  | -6.91                              | 3.41                             |
|         |                                             | Pbald            | C4'-PB                                  | -6.73                              | 3.62                             |
|         |                                             |                  |                                         |                                    |                                  |
| CYP4S24 | 279                                         | cis-permethrin   | gem                                     | -7.95                              | 4.93                             |
|         |                                             | trans-permethrin | gem                                     | -8.11                              | 4.87                             |
|         |                                             | PBalc            | C-OH                                    | -8.39                              | 3.13                             |
|         |                                             | Pbald            | C-HO                                    | -8.58                              | 3.11                             |

§ Active site cavity was calculated using the VOIDOO program with conventional probe radius of 1.4 Å. Å, angstrom. 1 Å=10<sup>-10</sup> m

<sup>#</sup> Predicted metabolic sites are indicated as following: Gem, germinal-dimethyl group; C5-PB, carbon 5 in alcohol moiety; C4'-PB, carbon 4' in terminal aromatic ring; C-OH, carbon attached to hydroxyl group; C-HO, carbon of carbonyl group

\* The distance between the heme iron and putative metabolic sites
